# Supplementary material for: ATP and MO25α Regulate the Conformational State of the STRADα Pseudokinase and Activation of the LKB1 Tumour Suppressor
Source: PLoS Biol. 2009 Jun 9;7(6):e1000126. doi: 10.1371/journal.pbio.1000126 (PMC2686265; doi:10.1371/journal.pbio.1000126)
Supplement: Table S1 — STRADα interaction rate constants for MO25α (WT) and MO25α mutants. k a and k d values were calculated from BIAcore sensorgrams in Figure S7. Error values are given in parentheses. (0.05 MB PDF) [file pbio.1000126.s008.pdf]

# Supplementary Table I

STRAD $\alpha$  interaction rate constants for MO25 $\alpha$  (WT) and MO25 $\alpha$  mutants.  $k_a$  and  $k_d$  values were calculated from BIAcore sensograms in Supplementary Fig. 7. Error values are given in brackets.

| Analyte and condition                                | $k_{a1}$ ( $M^{-1}s^{-1}$ )             | $k_{d1}$ ( $s^{-1}$ )         | $k_{a2}$ ( $M^{-1}s^{-1}$ )             | $k_{d2}$ ( $s^{-1}$ )         |
|------------------------------------------------------|-----------------------------------------|-------------------------------|-----------------------------------------|-------------------------------|
| <b>Target: MO25<math>\alpha</math> (WT)</b>          |                                         |                               |                                         |                               |
| STRAD $\alpha$                                       | $1.7 \times 10^5$ ( $7.0 \times 10^2$ ) | 0.63 ( $3.0 \times 10^{-3}$ ) | ND                                      | ND                            |
| STRAD $\alpha$ + ATP                                 | $1.6 \times 10^5$ ( $5.8 \times 10^2$ ) | 0.40 ( $1.3 \times 10^{-3}$ ) | $2.5 \times 10^6$ ( $1.1 \times 10^4$ ) | 0.03 ( $0.8 \times 10^{-4}$ ) |
| STRAD $\alpha$ + ATP + Mg $^{2+}$                    | $8.3 \times 10^4$ ( $3.5 \times 10^2$ ) | 0.43 ( $1.4 \times 10^{-3}$ ) | $7.9 \times 10^5$ ( $2.9 \times 10^3$ ) | 0.04 ( $8.8 \times 10^{-5}$ ) |
| His-STRAD $\alpha$ + ATP + Mg $^{2+}$                | $1.9 \times 10^5$ ( $1.4 \times 10^3$ ) | 0.55 ( $3.8 \times 10^{-3}$ ) | $1.1 \times 10^6$ ( $9.9 \times 10^3$ ) | 0.08 ( $4.8 \times 10^{-4}$ ) |
| <b>Target: MO25<math>\alpha</math> (M260A)</b>       |                                         |                               |                                         |                               |
| STRAD $\alpha$                                       | $1.1 \times 10^5$ ( $4.0 \times 10^2$ ) | 0.92 ( $3.0 \times 10^{-3}$ ) | ND                                      | ND                            |
| STRAD $\alpha$ + ATP                                 | $3.5 \times 10^5$ ( $1.9 \times 10^3$ ) | 0.52 ( $2.9 \times 10^{-3}$ ) | $2.0 \times 10^6$ ( $1.2 \times 10^4$ ) | 0.06 ( $2.2 \times 10^{-4}$ ) |
| STRAD $\alpha$ + ATP + Mg $^{2+}$                    | $1.9 \times 10^5$ ( $7.0 \times 10^2$ ) | 0.43 ( $1.7 \times 10^{-3}$ ) | $6.1 \times 10^5$ ( $3.8 \times 10^3$ ) | 0.05 ( $2.3 \times 10^{-4}$ ) |
| His-STRAD $\alpha$ + ATP + Mg $^{2+}$                | $3.3 \times 10^5$ ( $2.4 \times 10^3$ ) | 0.77 ( $4.6 \times 10^{-3}$ ) | $5.0 \times 10^5$ ( $3.6 \times 10^3$ ) | 0.11 ( $5.3 \times 10^{-4}$ ) |
| <b>Target: MO25<math>\alpha</math> (R227A)</b>       |                                         |                               |                                         |                               |
| STRAD $\alpha$                                       | ND                                      | ND                            | ND                                      | ND                            |
| STRAD $\alpha$ + ATP                                 | $1.1 \times 10^6$ ( $2.0 \times 10^3$ ) | 0.66 ( $1.0 \times 10^{-3}$ ) | ND                                      | ND                            |
| STRAD $\alpha$ + ATP + Mg $^{2+}$                    | $9.1 \times 10^5$ ( $2.0 \times 10^3$ ) | 0.72 ( $2.0 \times 10^{-3}$ ) | ND                                      | ND                            |
| His-STRAD $\alpha$ + ATP + Mg $^{2+}$                | $7.0 \times 10^5$ ( $3.0 \times 10^3$ ) | 1.61 ( $7.0 \times 10^{-3}$ ) | ND                                      | ND                            |
| <b>Target: MO25<math>\alpha</math> (R227A/M260A)</b> |                                         |                               |                                         |                               |
| STRAD $\alpha$                                       | ND                                      | ND                            | ND                                      | ND                            |
| STRAD $\alpha$ + ATP                                 | ND                                      | ND                            | ND                                      | ND                            |
| STRAD $\alpha$ + ATP + Mg $^{2+}$                    | ND                                      | ND                            | ND                                      | ND                            |
| His-STRAD $\alpha$ + ATP + Mg $^{2+}$                | ND                                      | ND                            | ND                                      | ND                            |

ND = Not determined
